# Supplementary material
Source: Springer Nature journal article supplement (https://www.springermedizin.de/resource/supplementary/13017_2011_213_MOESM4_ESM.pdf/9635714)

# PENETRATING BUTTOCK INJURY

Clinical algorithm following ABCDE assessment

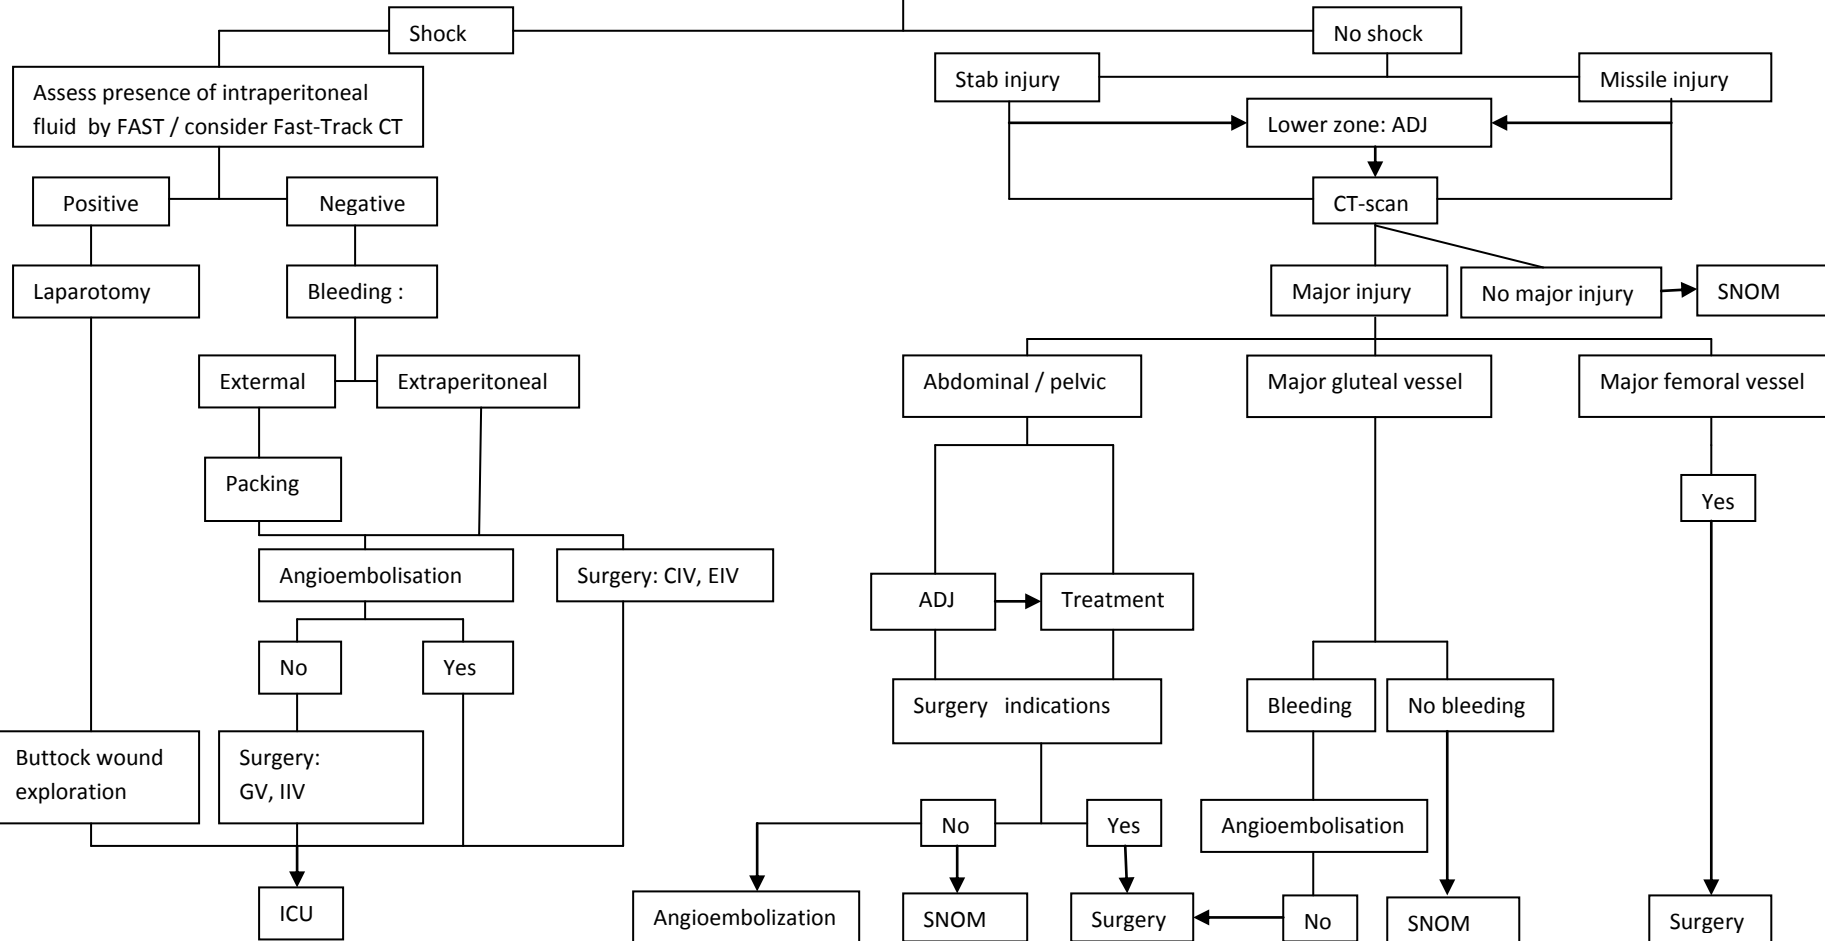

Supplement: MOESM4 [file 9635714]
